# Supplementary material
Source: PubMed Central journal article supplement (PMC4289112)

# Supplementary Figure S1

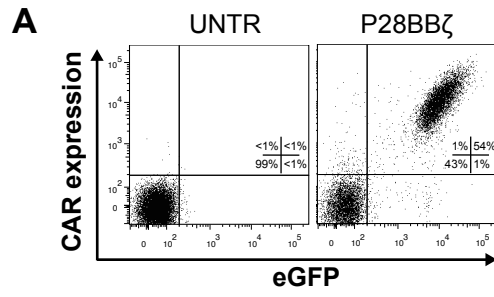

Supplementary Figure S2

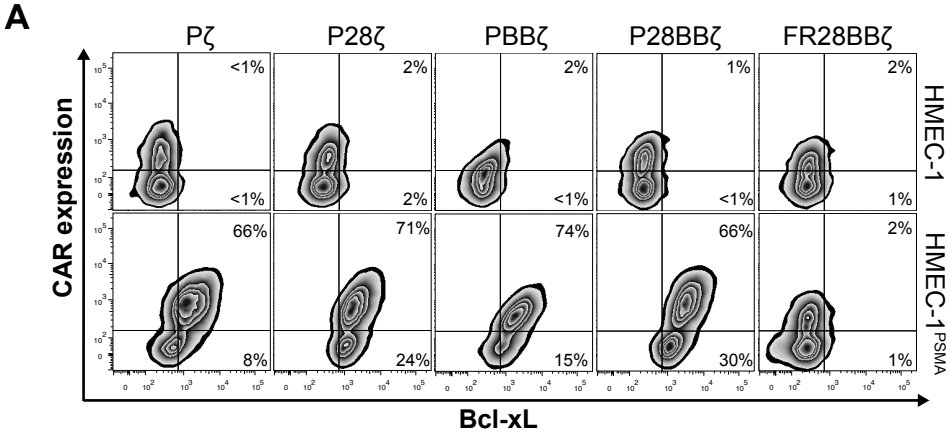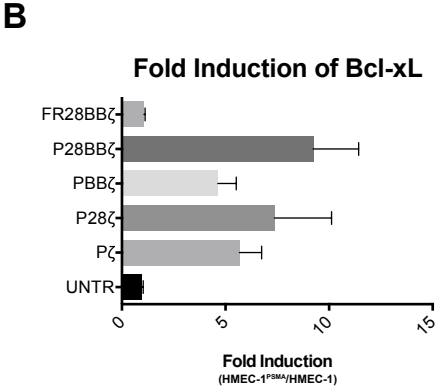

# Supplementary Figure S3

**A**

| Tumor Type                    | Study                       |                               |                              |                            |                            |                             |                           |                          |
|-------------------------------|-----------------------------|-------------------------------|------------------------------|----------------------------|----------------------------|-----------------------------|---------------------------|--------------------------|
|                               | Wernicke et al <sup>1</sup> | Abdel-Hadi et al <sup>2</sup> | Samplaski et al <sup>3</sup> | Haffner et al <sup>4</sup> | Haffner et al <sup>5</sup> | Denmeade et al <sup>6</sup> | Silver et al <sup>7</sup> | Chang et al <sup>8</sup> |
|                               | Number (%)                  | Number (%)                    | Number (%)                   | Number (%)                 | Number (%)                 | Number (%)                  | Number (%)                | Number (%)               |
| Bladder Cancer                |                             |                               | 8/167 (5%)                   |                            |                            | 40/94 (43%)                 | 68/92 (54%)               |                          |
| Breast Cancer                 | 68/92 (74%)                 |                               |                              |                            |                            | 34/44 (75%)                 |                           | 5/6 (83%)                |
| Colorectal Carcinoma          |                             | 75/100 (75%)                  |                              |                            | 110/130 (85%)              |                             | 3/29 (16%)                | 5/5 (100%)               |
| Gastric Cancer                |                             |                               |                              |                            | 79/119 (66%)               |                             |                           |                          |
| Hepatocellular Cancer         |                             |                               |                              |                            |                            | 39/41 (95%)                 |                           |                          |
| Melanoma                      |                             |                               |                              |                            |                            | 25/44 (57%)                 |                           | 5/5 (100%)               |
| Non-small cell lung carcinoma |                             |                               |                              |                            |                            |                             |                           | 5/5 (100%)               |
| Oral Cancer                   |                             |                               |                              | 72/96 (75%)                |                            |                             |                           |                          |
| Ovarian Cancer                |                             |                               |                              |                            |                            | 25/34 (75%)                 |                           |                          |
| Pancreatic ductal carcinoma   |                             |                               |                              |                            |                            |                             |                           | 4/4 (100%)               |
| Renal Cancer                  |                             |                               |                              |                            |                            | 44/46 (95%)                 | 8/17 (47%)                | 11/11 (100%)             |

- 1 Wernicke, AG, Varma, S, Greenwood, EA, Christos, PJ, Chao, KS, Liu, H, et al. (2014). Prostate-specific membrane antigen expression in tumor-associated vasculature of breast cancers. *APMIS : acta pathologica, microbiologica, et immunologica Scandinavica* **122**: 482-489.
- 2 Abdel-Hadi, M, Ismail, Y, and Younis, L (2014). Prostate-specific membrane antigen (PSMA) immunexpression in the neovasculature of colorectal carcinoma in Egyptian patients. *Pathology, research and practice*.
- 3 Samplaski, MK, Heston, W, Elson, P, Magi-Galluzzi, C, and Hansel, DE (2011). Folate hydrolase (prostate-specific membrane [corrected] antigen) 1 expression in bladder cancer subtypes and associated tumor neovasculature. *Modern pathology : an official journal of the United States and Canadian Academy of Pathology, Inc* **24**: 1521-1529.
- 4 Haffner, MC, Kronberger, IE, Ross, JS, Sheehan, CE, Zitt, M, Muhlmann, G, et al. (2009). Prostate-specific membrane antigen expression in the neovasculature of gastric and colorectal cancers. *Human pathology* **40**: 1754-1761.
- 5 Haffner, MC, Laimer, J, Chau, A, Schafer, G, Obrist, P, Brunner, A, et al. (2012). High expression of prostate-specific membrane antigen in the tumor-associated neo-vasculature is associated with worse prognosis in squamous cell carcinoma of the oral cavity. *Modern pathology : an official journal of the United States and Canadian Academy of Pathology, Inc* **25**: 1079-1085.
- 6 Denmeade, SR, Mhaka, AM, Rosen, DM, Brennen, WN, Dalrymple, S, Dach, I, et al. (2012). Engineering a prostate-specific membrane antigen-activated tumor endothelial cell prodrg for cancer therapy. *Science translational medicine* **4**: 140ra186.
- 7 Silver, DA, Pellicer, I, Fair, WR, Heston, WD, and Cordon-Cardo, C (1997). Prostate-specific membrane antigen expression in normal and malignant human tissues. *Clinical cancer research : an official journal of the American Association for Cancer Research* **3**: 81-85.
- 8 Chang, SS, Reuter, VE, Heston, WD, Bander, NH, Grauer, LS, and Gaudin, PB (1999). Five different anti-prostate-specific membrane antigen (PSMA) antibodies confirm PSMA expression in tumor-associated neovasculature. *Cancer research* **59**: 3192-3198.

**B**

| Tumor Type           | Less than 50% of tumor vessels are PSMA <sup>+</sup> |  |
|----------------------|------------------------------------------------------|--|
|                      | Number (%)                                           |  |
| Bladder Cancer       | NA (10-100%) <sup>3</sup>                            |  |
| Breast Cancer        | 26/48 (54%) <sup>1</sup>                             |  |
| Colorectal Carcinoma | 52/75 (69%) <sup>2</sup> , 52/130 (40%) <sup>4</sup> |  |
| Gastric Cancer       | 56/79 (71%) <sup>4</sup>                             |  |
| Oral Cancer          | 48/72 (67%) <sup>5</sup>                             |  |

**C**

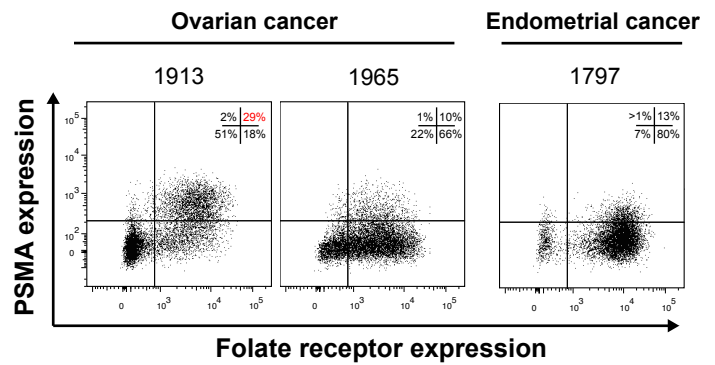

# Supplementary Figure S4

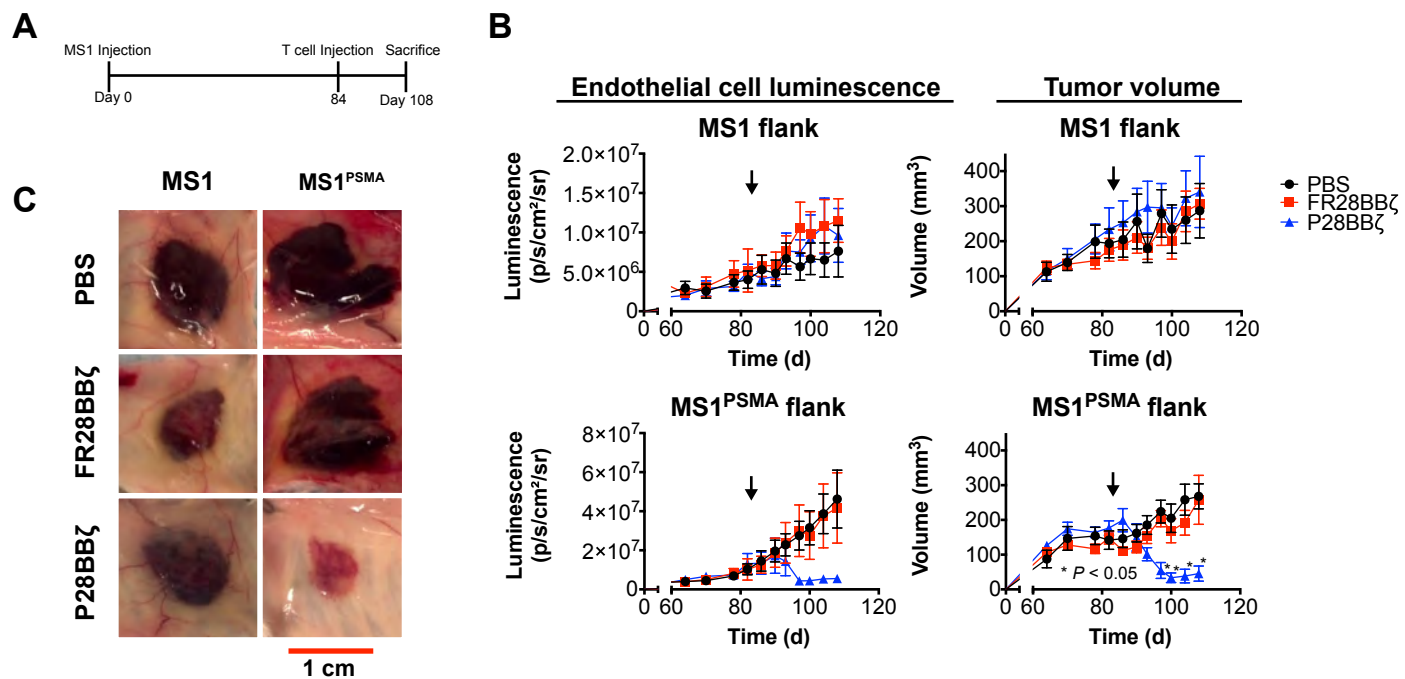

# Supplementary Figure S5

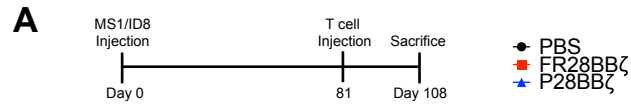

**B** Endothelial cell luminescence

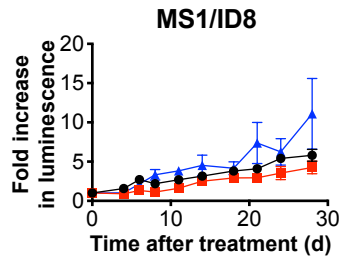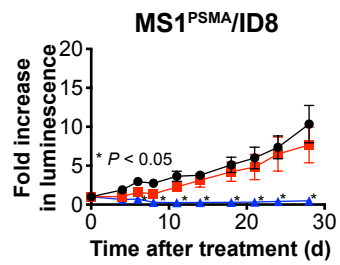

**C** Tumor volume

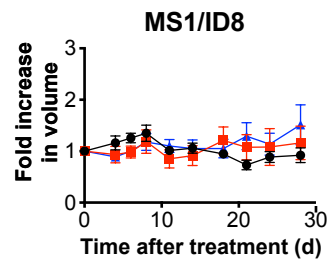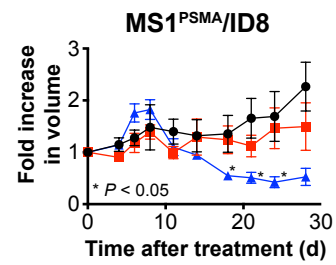

# Supplementary Figure S6

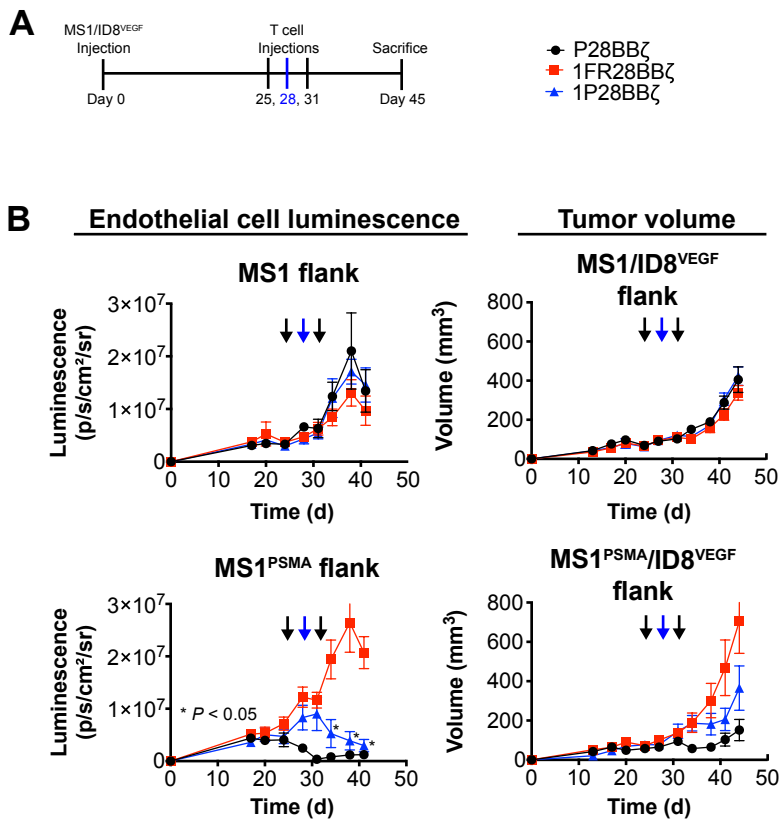

Supplement: NIHMS639738-supplement-2.pdf [file NIHMS639738-supplement-2.pdf]
